# Supplementary material for: Phase transition and chemical reactivity of 1H-tetrazole under high pressure up to 100 GPa
Source: Royal Society of Chemistry journal article supplement (doi:10.1039/d1cp02913d), 2021-01-01
Supplement: d1cp02913d1.pdf [file d1cp02913d1.pdf]

Supplementary Information for

Phase transition and chemical reactivity of 1H-tetrazole under high  
pressure up to 100 GPa

*Dexiang Gao,<sup>a</sup> Xingyu Tang,<sup>a</sup> Xuan Wang,<sup>a</sup> Xin Yang,<sup>a</sup> Peijie Zhang,<sup>a</sup> Guangwei Che,<sup>a</sup>  
Jun Han,<sup>a</sup> Takanori Hattori,<sup>b</sup> Yajie Wang,<sup>a</sup> Xiao Dong,<sup>c</sup> Haiyan Zheng,<sup>\*,a</sup> Kuo Li,<sup>a</sup> Ho-  
kwang Mao<sup>a</sup>*

<sup>a</sup> Center for High Pressure Science and Technology Advanced Research, Beijing  
100094, P. R. China

<sup>b</sup> J-PARC Center, Japan Atomic Energy Agency, Tokai, Ibaraki 319-1195, Japan

<sup>c</sup> Key Laboratory of Weak-Light Nonlinear Photonics, School of Physics, Nankai  
University, Tianjin 300071, P. R. China

\*E-mail: zhenghy@hpstar.ac.cn

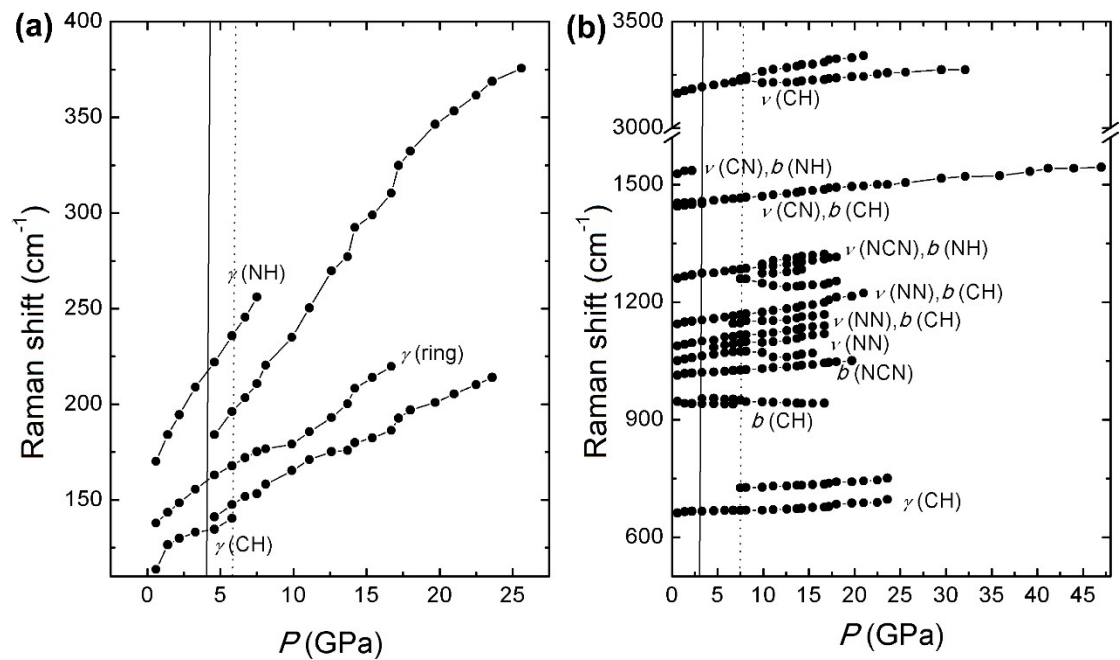

**Figure S1.** Raman frequency shifts of 1H-tetrazole as a function of pressure in the range of (a) 50-400  $\text{cm}^{-1}$  and (b) 600-3500  $\text{cm}^{-1}$ . Vertical solid line represents the beginning of phase transition and vertical dotted line represents the end of phase transition.

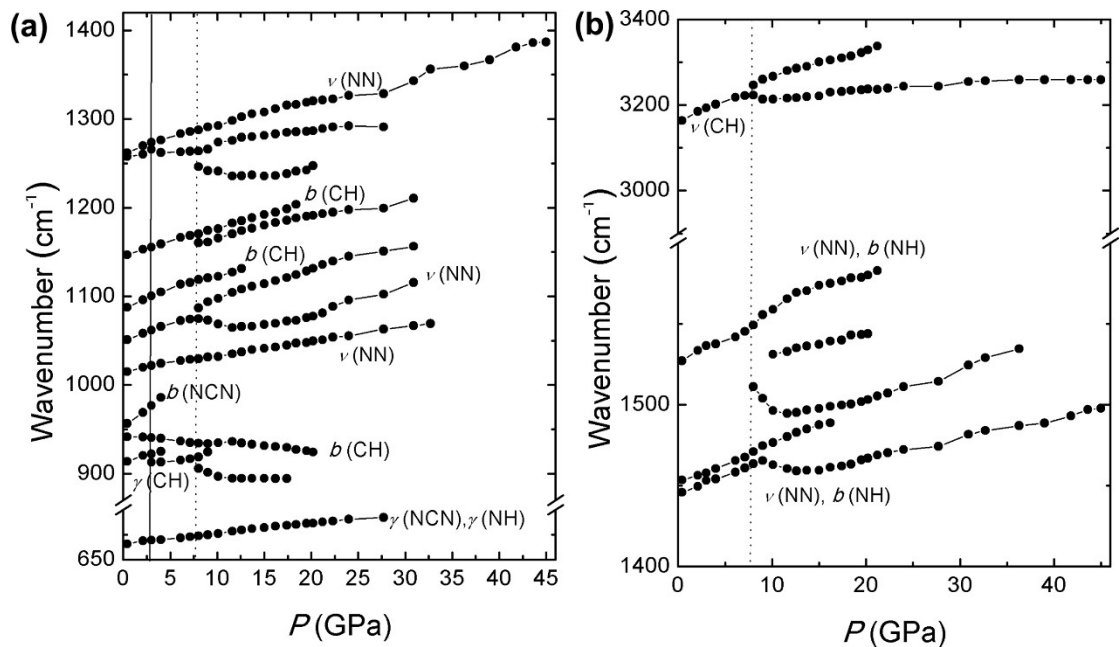

**Figure S2.** IR frequency shifts of 1H-tetrazole as a function of pressure in the range of (a) 600-1400  $\text{cm}^{-1}$  and (b) 1400-3400  $\text{cm}^{-1}$ . Vertical solid line represents the beginning of phase transition and vertical dotted line represents the end of phase transition.

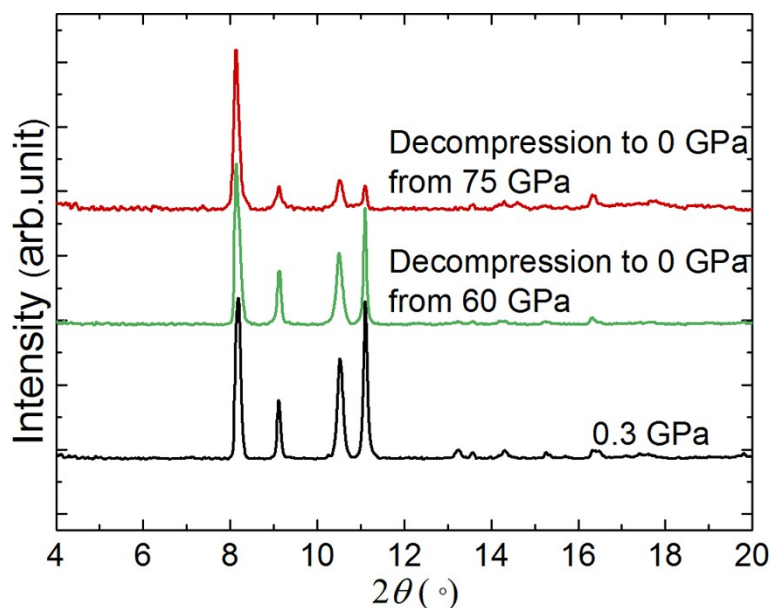

**Figure S3.** XRD patterns of the 1H-tetrazole recovered from high pressure. 1H-tetrazole undergoes a reversible phase transition process in compression-decompression cycle up to 60.0 and 75.0 GPa. The sample decomposition from 75.0 GPa has strong orientation.

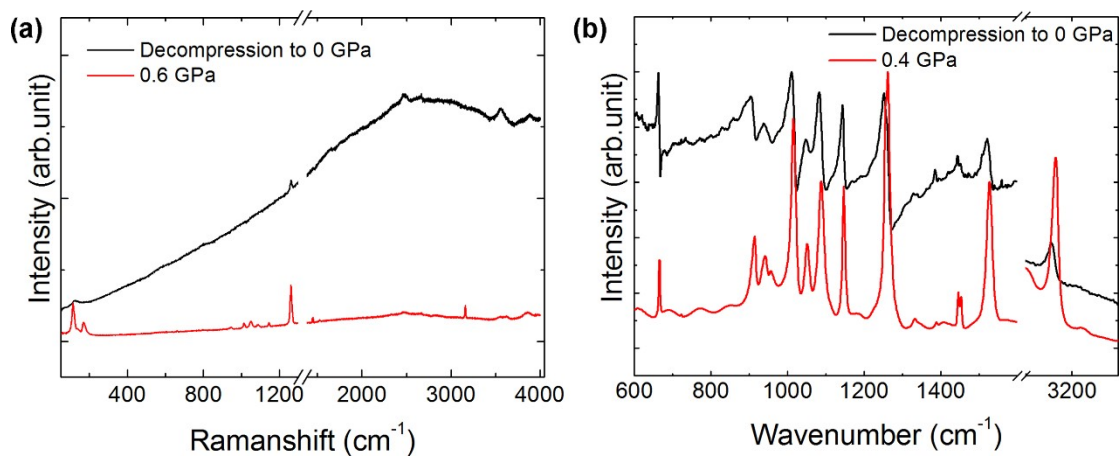

**Figure S4.** a) Raman and b) IR spectra of the 1H-tetrazole recovered from 100.3 GPa. As show in the IR spectra, the products after decompressing to ambient pressure from 100.3 GPa are still the 1H-tetrazole while strong background exists in Raman spectra.

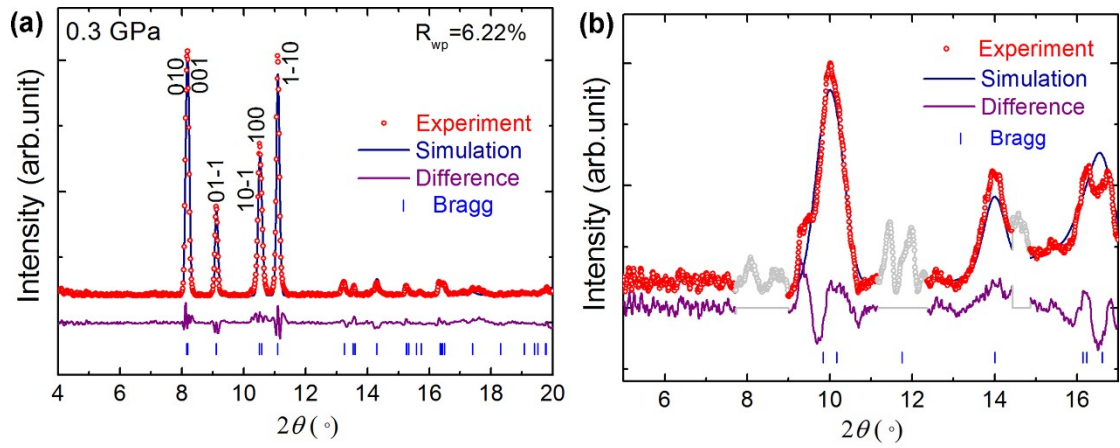

**Figure S5.** The Rietveld refinement results of the XRD patterns of phase I at 0.3 GPa and phase II at 100.3 GPa.

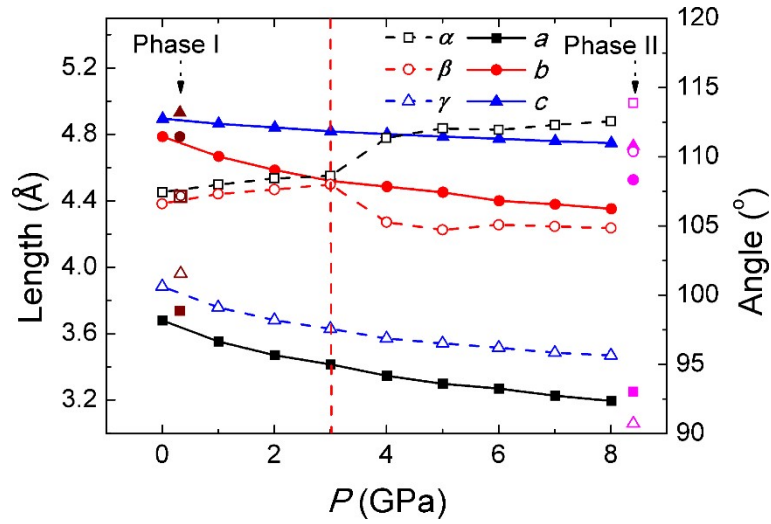

**Figure S6.** Optimized lattice parameters of phase I under high pressure. Above 4 GPa, the lattice parameters obviously change. The experimental data of phase I (0.3 GPa) and phase II (8.4 GPa) are also shown for comparison.

**Table S1.** Atomic coordinates in phase II at 10 GPa

| Label | x      | y      | z      |
|-------|--------|--------|--------|
| N1    | 0.1426 | 0.1672 | 0.8605 |
| N2    | 0.3064 | 0.4268 | 0.8357 |

|    |         |         |        |
|----|---------|---------|--------|
| N3 | 0.3116  | 0.3460  | 0.5544 |
| N4 | 0.1541  | 0.0383  | 0.3982 |
| C5 | 0.0520  | -0.0660 | 0.5963 |
| D1 | 0.0942  | 0.1628  | 0.0124 |
| H5 | -0.0732 | -0.2588 | 0.5479 |

---

Note: The uncertainty of the atomic coordinates is not provided by the software under the rigid body restrictions.

**Table S2.** Lattice parameters of phase II at 100.3 GPa and polymers obtained from XRD and simulation results, respectively

---

|              | 100.3 GPa  | Polymer 1 | Polymer 2 |
|--------------|------------|-----------|-----------|
| $a$ (Å)      | 2.567 (2)  | 2.591     | 2.361     |
| $b$ (Å)      | 3.691 (8)  | 3.355     | 3.673     |
| $c$ (Å)      | 3.825 (9)  | 4.577     | 4.038     |
| $\alpha$ (°) | 107.7 (4)  | 109.83    | 114.50    |
| $\beta$ (°)  | 95.67 (17) | 117.91    | 89.84     |
| $\gamma$ (°) | 92.95 (10) | 94.76     | 93.89     |

---
